# Supplementary material
Source: PubMed Central journal article supplement (PMC5876860)
Supplement: jamadermatol-154-409-s001.pdf [file jamadermatol-154-409-s001.pdf]

## Supplementary Online Content

Ashchyan HJ, Butler DC, Nelson CA et al. The association of age with clinical presentation and comorbidities of pyoderma gangrenosum. *JAMA Dermatol*. Published online February 14, 2018. doi:10.1001/jamadermatol.2017.5978

**eTable.** Diagnostic criteria for pyoderma gangrenosum

This supplementary material has been provided by the authors to give readers additional information about their work.

**eTable: Diagnostic Criteria for Pyoderma Gangrenosum<sup>1,2</sup>**

| Diagnostic criteria                                                                                                                                                                                                                                                                                                                                                                                                                                          |
|--------------------------------------------------------------------------------------------------------------------------------------------------------------------------------------------------------------------------------------------------------------------------------------------------------------------------------------------------------------------------------------------------------------------------------------------------------------|
| Major criteria                                                                                                                                                                                                                                                                                                                                                                                                                                               |
| <ol style="list-style-type: none"><li>1. Rapid progression of a painful, necrolytic cutaneous ulcer with an irregular, violaceous, and undermined border.</li><li>2. Other causes of cutaneous ulceration have been excluded.</li></ol>                                                                                                                                                                                                                      |
| Minor criteria                                                                                                                                                                                                                                                                                                                                                                                                                                               |
| <ol style="list-style-type: none"><li>1. History suggestive of pathergy or clinical finding of cribriform scarring.</li><li>2. Systemic disease associated with PG (inflammatory bowel disease, arthritis, IgA gammopathy, or malignancy).</li><li>3. Histopathologic findings (sterile dermal neutrophilia, ± mixed inflammation, ± lymphocytic vasculitis).</li><li>4. Treatment response (rapid response to systemic glucocorticoid treatment).</li></ol> |

<sup>1</sup> Su WP, Davis MD, Weenig RH, Powell FC, Perry HO. Pyoderma gangrenosum: clinicopathologic correlation and proposed diagnostic criteria. *Int J Dermatol.* 2004;43(11):790-800.

<sup>2</sup> Patients needed to meet both major criteria and two of four minor criteria for inclusion in the study.
